# Supplementary material for: The complete chloroplast genomes of three Betulaceae species: implications for molecular phylogeny and historical biogeography
Source: PeerJ. 2019 Jan 25;7:e6320. doi: 10.7717/peerj.6320 (PMC6348958; doi:10.7717/peerj.6320)
Supplement: Table S1 [file peerj-07-6320-s002.xlsx]

## Sheet: Sheet1
Table S1. Chloroplast genomes and GenBank accession numbers of the samples included in phylogenetic analyses.
Species	Size (bp)	GenBank number
Corylus wangii	159825	MH628454
Ostryopsis davidiana	159286	MH628451
Alnus cremastogyne	160538	MH628453
Corylus avellana	160160	KX822768
Alnus alnobetula	160534	MF136496
Ostrya rehderiana	159347	KT454094
Ostrya trichocarpa	159122	KY088271
Carpinus tientaiensis	160104	KY174338
Carpinus putoensis	159673	KX695124
Betula nana	160579	KX703002
Betula cordifolia	160771	MG386401
Juglans regia	160370	MF167463
Juglans nigra	160274	MF167462
