# Supplementary material for: The complete chloroplast genomes of three Betulaceae species: implications for molecular phylogeny and historical biogeography
Source: PeerJ. 2019 Jan 25;7:e6320. doi: 10.7717/peerj.6320 (PMC6348958; doi:10.7717/peerj.6320)
Supplement: Table S4 [file peerj-07-6320-s005.xlsx]

## Sheet: Sheet1
Table S4 List of tandem repeats in the chloroplast genome of three Betulaceae species.
NO.	Indices	Repeat number	Size(bp)	Location	Region
Ostryopsis Decne
1	4748--4887	2.2	64	trnK-UUU/rps16	LSC
2	9914--9983	3.7	16	trnS-GCU/trnG-GCC	LSC
3	11972--12017	1.9	24	trnR-UCU/atpA	LSC
4	16687--16766	2.1	39	atpH/atpI	LSC
5	16687--16781	2.4	39	atpH/atpI	LSC
6	35714--35766	2.5	22	trnM-CAU/psbD	LSC
7	35701--35767	1.9	35	trnM-CAU/psbD	LSC
8	40702--40748	2	23	trnG-UCC/trnfM-CAU	LSC
9	55358--55509	2.1	74	ndhC/trnV-UAC	LSC
10	55579--55616	2	19	ndhC/trnV-UAC	LSC
11	63848--63891	2	22	accD/psaI	LSC
12	80112--80199	2.1	42	psbH/petB	LSC
13	84462--84675	2	107	rpl36/infA	LSC
14	94011--94078	3.2	21	ycf2	IRa
15	96431--96472	2.3	18	ycf2	IRa
16	104198--104235	2.1	18	rps12/trnV-GAC	IRa
17	104286--104324	2.1	19	rps12/trnV-GAC	IRa
18	112564--112624	2	31	rrn4.5/rrn5	IRa
19	115339--115552	2	108	ycf1/ndhF	IRa
20	124704--124898	2	97	ndhG/ndhI	SSC
21	126435--126583	2.1	70	ndhA/orf188	SSC
22	137104--137164	2	31	rrn5/rrn4.5	IRb
23	144084--144143	2.1	29	rrn16/trnV-GAC	IRb
24	145360--145397	2.1	18	trnV-GAC/rps12	IRb
25	145368--145461	2.1	45	trnV-GAC/rps12	IRb
26	153168--153209	2.3	18	ycf2	IRb
27	155563--155651	4.1	21	ycf2	IRb
Alnus cremastogyne
1	443--483	2.9	14	trnH-GUG/psbA	LSC
2	5484--5529	2	23	trnK-UUU/rps16	LSC
3	5565--5616	3.3	16	trnK-UUU/rps16	LSC
4	8331--8369	2.1	19	trnQ-UUG/psbK	LSC
5	9772--9962	3	8	trnS-GCU/trnG-GCC	LSC
6	9804--9963	4.1	37	trnS-GCU/trnG-GCC	LSC
7	9814--9975	4.6	35	trnS-GCU/trnG-GCC	LSC
8	9808--9969	3.6	49	trnS-GCU/trnG-GCC	LSC
9	9774--9942	7.4	23	trnS-GCU/trnG-GCC	LSC
10	9852--9968	5.2	23	trnS-GCU/trnG-GCC	LSC
11	16669--16762	3.8	25	atpH/atpI	LSC
12	16674--16762	6.1	15	atpH/atpI	LSC
13	36351--36419	1.9	36	trnE-UUC/psbD	LSC
14	39701--39946	2	123	trnS-UGA/psbZ	LSC
15	46769--46834	2.2	30	psaA/ycf3	LSC
16	47133--47198	2.1	32	ycf3 (intron)	LSC
17	52832--52904	2	36	trnF-GAA/ndhJ	LSC
18	53244--53300	2.1	28	trnF-GAA/ndhJ	LSC
19	55589--55635	2.8	17	ndhC/trnV-UAC	LSC
20	71051--71107	2.1	27	trnW-CCA/trnP-UGG	LSC
21	71525--71578	2	27	trnP-UGG/psaJ	LSC
22	93918--93985	3.2	21	ycf2	IRa
23	112307--112367	2	31	rrn4.5/rrn5	IRa
24	118019--118061	2	21	ndhF/rpl32	SSC
25	120957--121015	2	29	ccsA/ndhD	SSC
26	136759--136819	2	31	rrn5/rrn4.5	IRb
27	155142--155230	4.1	21	ycf2	IRb
Corylus wangii
1	11916--11961	1.9	24	trnR-UCU/atpA	LSC
2	16668--16751	5.7	15	atpH/atpI	LSC
3	16694--16743	2.4	21	atpH/atpI	LSC
4	29972--30105	2.1	64	rpoB/trnC-GCA	LSC
5	40691--40737	2	23	trnG-UCC/trnfM-CAU	LSC
6	52830--52865	2	18	trnF-GAA/ndhJ	LSC
7	55342--55401	2.1	28	ndhC/trnV-UAC	LSC
8	58968--59007	2	20	atpB/rbcL	LSC
9	63860--63903	2	22	accD/psaI	LSC
10	93757--93824	3.2	21	ycf2	LSC
11	96177--96218	2.3	18	ycf2	LSC
12	103950--103987	2.1	18	rps12/trnV-GAC	LSC
13	112164--112224	2	31	rrn4.5/rrn5	IRa
14	132069--132108	2.7	15	ycf1	IRa
15	136692--136752	2	31	rrn5/rrn4.5	IRa
16	144941--144978	2.1	18	trnV-GAC/rps12	IRa
17	152710--152751	2.3	18	ycf2	SSC
18	155105--155193	4.1	21	ycf2	IRb
